# Supplementary material for: Ultra-low density porous polystyrene monolith: facile preparation and superior application
Source: Royal Society of Chemistry journal article supplement (doi:10.1039/c3ta11761h), 2013-01-01

## Supporting Information

*for*

### Ultra-low Density Porous Polystyrene Monolith: Facile Preparation and Superior Application

Ping Jing, Xiaohua Fang, Junlin Yan, Jie Guo, Yu Fang\*

*Key Laboratory of Applied Surface and Colloid Chemistry, Ministry of Education, School of Chemistry and Chemical Engineering, Shaanxi Normal University, Xi'an 710062, P.R. China.*

#### Figure and Video Legends

**Fig. S1** SEM images of the gel or gel-emulsion networks of different water content: (a) 0%, (b) 20%, (c) 50%, and (d) 90% (v/v).

**Fig. S2** SEM pictures of the micro-structures of the relevant gel-emulsions in the presence of fourth component, a) CDDE/water/styrene containing 50% water and an inert solvent, b) CDDE/water/styrene containing 90% water and AN, and c) CDDE/water/styrene containing 90% water and KH-570.

**Fig. S3** SEM micrographs of porous monoliths with different water contents templates: a) 50%, b) 80%, c) 90% (v/v).

**Fig. S4** Molecular structure of the stabilizer CDDE.

**Fig. S5** Molecular structure of 1,6,7,12-tetra(4-tert-butylphenoxy)-perylene-3,4,9,10-tetracarboxylic dianhydride, the fluorescence probe adopted.

**Video S1.** Selective absorption of kerosene from water by using the porous polystyrene monolith.

**Video S2.** Squeezing out of the oil absorbed by the porous polystyrene monolith.

**Video S3.** Recovery of the porous polystyrene monolith after utilization.

---

\* Corresponding author: Yu Fang, Tel: +0086 29 85310081; Fax: +0086 29 85310097.  
E-mail address: yfang@snnu.edu.cn (Yu Fang).

**Fig.S1**

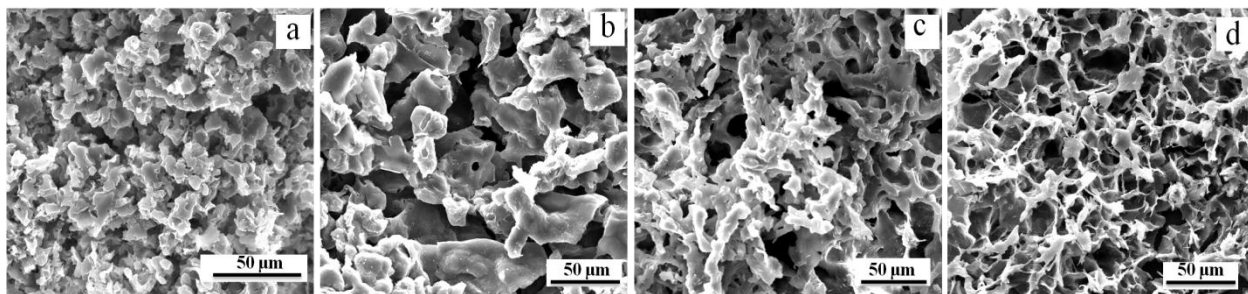

**Fig. S2**

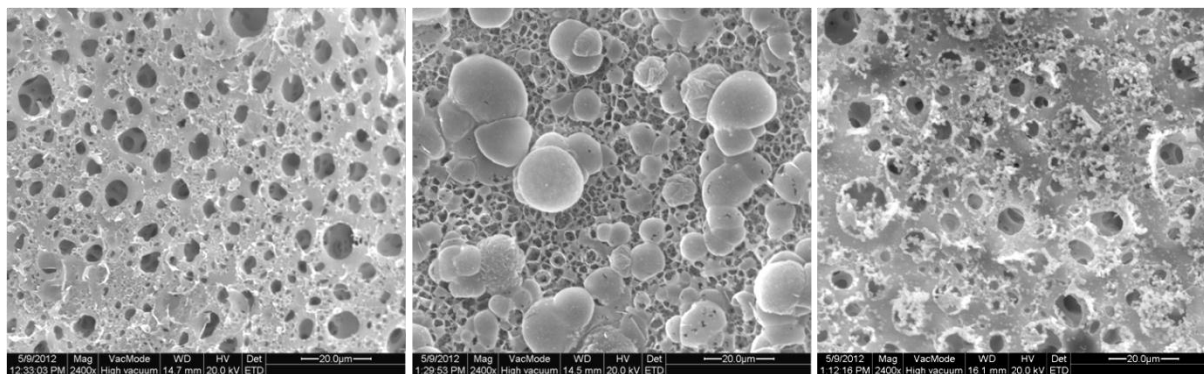

**Fig. S3**

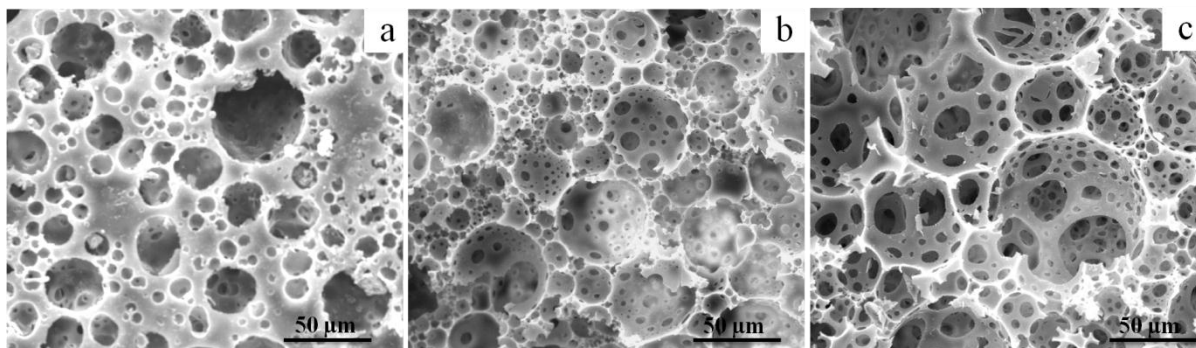

**Fig. S4**

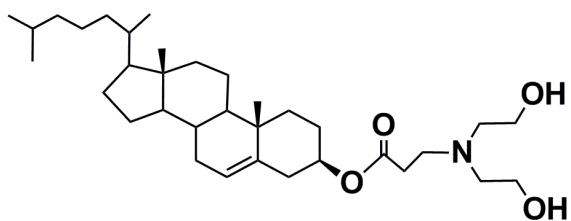

**Fig. S5**

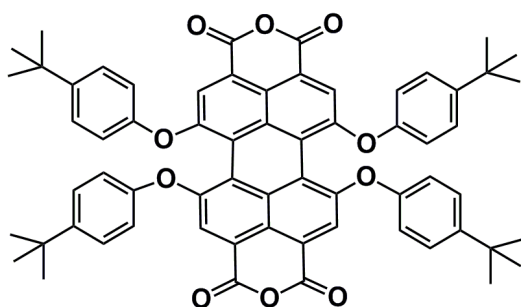

Supplement: c3ta11761h.pdf [file c3ta11761h.pdf]
